1 **Ultra-sensitive coupling between organ growth and size by YAP-1 ensures uniform body plan**  
2 **proportions in *C. elegans***

3

4 **Authors:**

5 Klement Stojanovski<sup>1</sup>, Ioana Gheorghe<sup>1</sup>, Anne Lanjuin<sup>2</sup>, William B. Mair<sup>2</sup>, Benjamin D. Towbin<sup>1,3</sup>

6 **Affiliations:**

7 <sup>1</sup> University of Bern, Bern, Switzerland.

8 <sup>2</sup> Dept. Molecular Metabolism, Harvard TH Chan School of Public Health

9 <sup>3</sup> to whom correspondence should be addressed: benjamin.towbin@unibe.ch

10

11

12

13 **Abstract**

14 Imbalance between the growth rate of different organs can amplify to large deviations of their size  
15 proportions during development. We show that, for the *C. elegans* pharynx, such size divergence is  
16 prevented by reciprocal coordination of pharyngeal growth with other tissues. Live imaging of  
17 hundreds of individuals revealed that small pharynxes grow more rapidly than large pharynxes,  
18 catching up in volume during development. Moreover, pharynx-to-body size proportions were robust  
19 to even strong tissue-specific inhibition of mTORC1 and insulin signalling. Tissue-specific depletion of  
20 these pathways slowed-down the growth of the respective tissue and additionally triggered a systemic  
21 growth response that ensured appropriate organ size proportions. By mathematical modelling, we  
22 show that the conservation of proportions requires a bi-directional ultra-sensitive coupling of body  
23 growth and pharynx size that cannot be explained by a reduction of food uptake alone. Instead, organ  
24 growth coordination requires regulation by the mechano-transducing transcriptional co-activator  
25 YAP/*yap-1*. Knock-down of *yap-1* makes animals sensitive to tissue-specific inhibition mTORC1  
26 inhibition, causing a disproportionate pharynx and developmental arrest. Our data suggests that  
27 mechano-transduction tightly coordinates organ growth during *C. elegans* development to ensure the  
28 uniformity of body plan proportions among individuals.

29

## 30 Introduction

31 The correct size and proportions of organs are crucial for organismal function, and disproportionate  
32 organs are associated with a large diversity of diseases<sup>1-4</sup>. However, attaining correct size proportions  
33 is challenged by fluctuations in organ growth rates. Since organs grow by orders of magnitude during  
34 development, in principle, even small deviations from the correct organ growth rates could amplify to  
35 large deviations in their size over time<sup>5,6</sup>. Size divergence of organs is usually not observed in nature,  
36 but the mechanisms that prevent divergence are not well understood.

37 Size homeostasis has been studied extensively at the scale of individual cells. Quantitative time-lapse  
38 microscopy of yeasts, bacteria, and mammalian cells revealed that stochastic fluctuations of cell size  
39 are corrected within a few cell divisions<sup>7-11</sup>. Cell size correction often involves a so-called adder or  
40 sizer mechanisms<sup>7-11</sup>, in which large cells undergo a smaller volume fold change per cell cycle than  
41 small cells. These cell autonomous mechanisms break the intrinsic tendency of exponential growth to  
42 amplify differences in cell size, such that cells that deviate from the norm return to a stable reference  
43 point within a few cell cycles. We have recently shown that, for *C. elegans*, size uniformity at the scale  
44 of the entire body volume does not follow adders or sizers<sup>12</sup>. Instead, the volume fold change per  
45 larval stage is near independent of the starting size. Nevertheless, rapidly and slowly growing  
46 individuals only weakly diverge in volume due to an inverse coupling of the growth rate to the duration  
47 of development by a genetic oscillator, a mechanism we termed a growth-coupled folder<sup>12</sup>.

48 At the scale of organs, size control involves tissue-autonomous and systemic mechanisms. For  
49 example, morphogen gradients are thought to limit the lateral expansion of imaginal discs in  
50 *Drosophila melanogaster* and thereby limit their final size tissue autonomously<sup>13,14</sup>. At the same time,  
51 experiments using *Drosophila* also provide evidence for systemic size control mechanisms<sup>15,16</sup>. For  
52 example, growth inhibition of the *Drosophila* wing disc triggers the release of the relaxin-like signalling  
53 peptide *Dilp8*, which systemically modulates larval growth through the growth hormone ecdysone  
54<sup>17,18</sup>. Similarly, unilateral inhibition of limb growth in mice triggers a growth response that retains  
55 proper limb symmetry<sup>19,20</sup>. Despite these important advances, it remains unclear how the many  
56 tissues of an organism coordinate their growth to robustly reach the correct size proportions.

57 Here, we used the pharynx of *C. elegans* to ask if the organ size uniformity involves adders and sizers,  
58 and whether this control is systemic or autonomous. We find that, similar to adder-like mechanisms  
59 described in unicellular organisms, spontaneously occurring deviations in pharynx size were corrected  
60 by size-dependent growth regulation. However, in contrast to bacteria, size control was not cell  
61 autonomous and involved crosstalk between different cells: inhibition of growth signalling in the  
62 pharynx triggered a systemic response in other tissues and vice versa. This bi-directional growth  
63 response is ultra-sensitive to deviations in pharyngeal size of a few percent and cannot be explained  
64 by limitation of food uptake alone. Consequently, the scaling between pharynx and body size is nearly  
65 invariant even under strong tissue-specific growth perturbations. Genetic experiments revealed that  
66 the mechano-transducing transcriptional coactivator *Yes associated protein* (YAP)<sup>21</sup> is required for  
67 organ growth coordination, suggesting an important role of mechano-sensing in the robustness of  
68 organ size proportions of *C. elegans*.

## 69 Results

### 70 Quantification of pharyngeal and total body growth of *C. elegans* by live imaging

71 To quantify the growth and size of the pharynx relative to other tissues, we created a *C. elegans* strain  
72 expressing a green fluorescent protein in the pharyngeal muscle (*myo-2p::gfp*), and ubiquitously  
73 expressing a red fluorescent protein (*eft-3p::mscarlet*) (Fig. 1a). We recorded growth of hundreds of

74 individual animals of this strain at 25 °C in arrayed micro chambers using a temperature-controlled  
75 fluorescence microscope at a time resolution of 10 minutes<sup>12</sup>. By automated image analysis<sup>12</sup>, we  
76 determined the length of the pharynx and the total body (Supplemental Fig. 1a) at each timepoint  
77 from planar optical sections, and inferred their volumes given their near rotational symmetry (Fig. 1b)  
78<sup>22</sup>.

79 As we previously observed<sup>12</sup>, total body growth was halted during four periods of approximately two  
80 hours, corresponding to lethargic phases prior to cuticular moulting (Fig. 1b). We could thereby  
81 automatically detect larval stage transitions by the time points at which growth re-started and feeding  
82 resumed and compute growth rates  $\mu$  of body and pharynx at each larval stage as the increase in  
83  $\log(\text{volume})$  per time. Throughout this article growth rate refers to the change in  $\log$  transformed  
84 volume per time, i.e. the growth rate normalized to the current size, unless specified as the absolute  
85 growth rate  $\mu_{\text{abs}}$ , which indicates the absolute change in volume per time.

86 The average growth rate of the pharynx was about half the growth rate of the total body volume  
87 (doubling times of 12.02 +/- 0.94 vs. 6.64 +/- 0.51 hours). Consistently, the cumulative volume fold  
88 change from hatch to the fourth moult (M4) was 6 times larger for the total body (53.3 +/- 5.3 fold)  
89 than for the pharynx (9.02 +/- 1.05 fold). Similar to allometric growth of the head and body of many  
90 animals, the volume fraction of the pharynx thus declined from 18 +/- 1.7% at hatching to 3.1 +/- 0.27  
91 % at M4.

## 92 **Pharyngeal size heterogeneity does not increase during development**

93 During development, small differences in the growth rates among individuals are prone to amplify to  
94 large differences in size, particularly during exponential growth. As we have previously shown, the  
95 coefficient of variation (CV) of the body volume among individuals nevertheless remains below 10%<sup>12</sup>  
96 (CV of body length: ~4%) (Fig. 1c, Supplemental Fig. 1b). This maintenance of body size uniformity  
97 occurs largely due to an inverse coupling of growth to the duration of larval stages, and not due to  
98 sizers or adders<sup>12</sup>.

99 Remarkably, the CV of the pharyngeal volume (4%) and length (2%) was even smaller than for total  
100 body size (Fig. 1c, Supplemental Fig. 1c), except for the size at hatching. To ask if the degree of size  
101 heterogeneity was smaller than expected given the heterogeneity of the pharyngeal growth rates, we  
102 ran simulations in which we randomly shuffled measured growth parameters among individuals. We  
103 then compared the measured size heterogeneity to those produced by randomized simulations.  
104 Building on our previous work<sup>12</sup>, our simulations distinguished four different scenarios. First, we  
105 independently randomized the growth rates and larval stage durations among individuals (a model  
106 called *uncoupled folder*). Second, we randomly shuffled the volume fold changes per larval stage  
107 among individuals but retained the coupling between growth and larval stage duration (*coupled*  
108 *folder*). Third, we simulated a coupled folder, but started simulations at the first moult (M1) instead  
109 of at hatch. This comparison is motivated by our previous description of unique features to size control  
110 at the L1 stage<sup>12</sup>. Fourth, we simulated an adder mechanism by randomly shuffling the added volume  
111 per larval stage among individuals. Out of these four simulations, only the simulated adder was close  
112 to the observed heterogeneity. Thus, unlike for total body volume<sup>12</sup>, a coupled folder cannot  
113 recapitulate the smaller size heterogeneity of the pharynx. Together, these data suggest that the  
114 pharynx is under more stringent size control than the total body volume (Fig. 1d, Supplemental Fig.  
115 1c)<sup>12</sup>.

## 116 **Sub-exponential pharyngeal growth within one larval stage results in an adder-like behaviour**

117 Under exponential growth and in the absence of size-dependent control of growth, the volume growth  
118 per time or developmental stage is expected to scale with the current size of an individual. Indeed,  
119 the added total body volume per larval stage of *C. elegans* was positively correlated with the volume  
120 at larval stage entry (Fig. 2a, Supplemental Fig. 2b), except for L1 animals as we previously described  
121 <sup>12</sup>. However, for the pharynx, we did not observe this same relation. Instead, the absolute volume  
122 increase  $\Delta V$  during L2 and L4 stages was nearly independent of the starting volume  $V_1$ , reminiscent of  
123 an adder mechanism <sup>7,9,10</sup>. During L1 and L3, we observed an even more stringent size-dependent  
124 control of pharynx growth, as  $\Delta V$  and  $V_1$  were anti-correlated in these stages (Fig. 2b, Supplemental  
125 Fig. 2a).

126 To study the dynamics of pharyngeal size control, we analysed the volume growth rate trajectories  
127 within each larval stage for animals of different size. We binned individuals according to their pharynx  
128 or body volume in the middle of each larval stage and calculated the absolute rate of volume increase  
129 ( $\mu_{\text{abs}} = dV/dt$ ) as a function of larval stage progression. Consistent with autocatalytic and supra-linear  
130 body growth<sup>12</sup>,  $\mu_{\text{abs}}$  was correlated with the body size and was larger at the end than at the beginning  
131 of each larval stage (Fig. 2c). However, although  $\mu_{\text{abs}}$  of the pharynx increased near exponentially  
132 between larval stages (Supplemental Fig. 2d),  $\mu_{\text{abs}}$  was nearly constant within a given larval stage (Fig.  
133 2c). Moreover, large and small pharynxes had nearly the same  $\mu_{\text{abs}}$  (Fig. 2c, Supplemental Fig. 2d). We  
134 conclude that although pharyngeal size trajectories closely mimic exponential growth when inspected  
135 across multiple larval stages (Fig. 1b, Supplemental Fig. 2d), the pharynx grows near linearly over time  
136 within each larval stage. Linear growth at an absolute growth rate  $\mu_{\text{abs}}$  that is independent of the  
137 starting size is expected to produce a size-independent volume increase  $\Delta V$  per time ( $V(t) = V_0 +$   
138  $\mu_{\text{abs}} * t = V_0 + \Delta V$ ), which is consistent with the observed adder mechanism of the pharynx.

139 As described above, simulations of an adder can indeed reproduce the observed coefficient of  
140 variation in pharyngeal volume, whereas other models produce a size divergence that is larger than  
141 we experimentally observed (Fig. 1d, Supplemental Fig. 1c). Notably, we do not find a correlation  
142 between the pharynx size and the body growth rate among individuals, suggesting that the pharynx  
143 size is not limiting for growth in the observed range, and that uniformity of pharynx size is not a passive  
144 consequence of changes in the food uptake rate (Supplemental Fig. 2e).

#### 145 **Auxin-inducible degradation of RagA/RAGA-1 allows quantitative titration of growth rates**

146 Size control of the pharynx could be tissue-autonomous or involve crosstalk with other tissues. To  
147 distinguish between these two scenarios, we developed an experimental approach to perturb growth  
148 tissue-specifically by auxin-induced degradation (AID) <sup>23</sup> of the mTORC1 activator RagA/RAGA-1 <sup>24-26</sup>.  
149 To this end, we expressed the plant ubiquitin ligase Tir1 under the control of ubiquitous or tissue-  
150 specific promoters and modified the endogenous locus of *raga-1* with an aid-tag. Supplementation of  
151 the plant hormone auxin (indole-3-acetic-acid, IAA) leads to dosage dependent ubiquitination of aid-  
152 tagged proteins and consequently their quantitative knock-down by proteasomal degradation in the  
153 tissue where Tir1 is expressed <sup>27</sup>. We could thereby perturb growth by depleting RAGA-1 by AID (Fig.  
154 3a) and measure length and volume growth in micro chambers. Length and volume measurements  
155 led to equivalent conclusion. In the following, for their higher accuracy, length measurements are  
156 shown in the main figures. The corresponding volume data is displayed in Supplemental Figures.

157 Consistent with the effect of *raga-1* deletion mutants<sup>12</sup>, ubiquitous AID of RAGA-1 reduced pharynx  
158 and body growth rates and extended larval stage durations (Fig. 3c, Supplemental Fig. 3a-b). Growth  
159 inhibition was quantitatively dependent on the strength of knock-down and scaled with the IAA  
160 concentration applied. We note that Tir1 has weak activity towards the AID tag even in the absence  
161 of IAA <sup>28,29</sup>, such that growth was reduced by 10-21% (depending on the larval stage) compared to a

162 strain not expressing Tir1. Throughout this study, we therefore include a strain lacking Tir1 expression,  
163 in addition to omitting IAA as a negative control.

### 164 **Pharynx specific inhibition of *RagA/raga-1* reduces growth, but retains pharynx-to-body size** 165 **proportions**

166 To ask how tissue-specific AID of RAGA-1 affects the allometric relation between the pharynx and the  
167 rest of the body, we used two strains expressing Tir1 only in selected tissues<sup>23,27</sup> (Fig. 3b). First, we  
168 expressed Tir1 specifically in the pharyngeal muscle under the control of the *myo-2* promoter<sup>23</sup>.  
169 Second, we restricted Tir1 expression to hypodermal and seam cells<sup>27</sup> (collectively referred to as  
170 epidermis<sup>30</sup> from here onwards) using the *col-10* promoter. In either of these strains, pharyngeal as  
171 well as body growth were quantitatively reduced in an IAA dependent manner (Fig. 3c, Supplemental  
172 Fig. 3a-b). Thus, depletion of RAGA-1 in a single tissue reduces growth non-autonomously also in other  
173 tissues. Epidermal RAGA-1 AID reduced growth less strongly than pharyngeal RAGA-1 AID, which may  
174 be due to biological or technical differences in the effectiveness of reducing RAGA-1 or mTORC1  
175 activity in these two tissues.

176 To quantify the non-autonomous response between pharynx and body growth, we plotted log-  
177 transformed length of body and pharynx at all four moults (M1 to M4) against each other (Fig. 3d). An  
178 equivalent analysis of volumes is shown in Supplemental materials (Supplemental Fig. 3c-d). After log  
179 transformation, body and pharynx length were near linearly related, as is expected for two tissues  
180 with near exponential growth. We call this relationship the P-line (P for pharynx), where the slope  
181  $m = \frac{d \log(\text{length}_p)}{d \log(\text{length}_b)}$  of the P-line corresponds to the ratio of the exponential growth rate of pharynx  
182 and body ( $m = \frac{\mu_p}{\mu_b}$ ). Analysis of the P-line under perturbed conditions thus allows us to distinguish  
183 different scenarios: (i) In the absence of tissue growth coordination, tissue-specific inhibition of  
184 growth is expected to change the ratio between pharynx and body growth rates and thus alter the  
185 slope  $m$  of the P-line. (ii) If unperturbed tissues respond with a proportional change in their growth  
186 rate the slope of the P-line remains constant. (iii) A temporary deviation from the unperturbed organ  
187 growth proportions early in development, followed by an appropriate adjustment of systemic growth  
188 rates would produce a P-line with unchanged slope, but a change in y-intercept.

189 We note that in some experiments, we observed a very rapid length extension immediately after  
190 hatching (Fig. 3c). This effect is likely of technical origin and may relate to a weak penetration of IAA  
191 through the egg shell. To avoid confounding effects, we therefore start our analysis at 30% passage of  
192 the L1 stage rather than immediately after hatching. Epidermal as well as pharyngeal RAGA-1 AID were  
193 in close agreement with scenario (iii) described above. Under pharyngeal RAGA-1 AID, the P-line was  
194 shifted down by 5-8% but did not systematically change in slope (Fig. 3d). This was true even at very  
195 high IAA concentrations and throughout development, except for the highest IAA concentration at the  
196 last moult. Similarly, epidermal RAGA-1 AID caused a near parallel upshift of the P-line by less than 5%  
197 without systematically changing its slope. Thus, in both tissues, RAGA-1 AID resulted in only a small  
198 difference in length proportions that plateaued at 5-8% and that did not scale with the degree of  
199 RAGA-1 inhibition (Fig. 3e, Supplemental Fig 3e). This saturation of pharyngeal length deviation  
200 suggests that tissues in which RAGA-1 was not depleted by AID reduced their growth rate near  
201 proportionally to the tissue targeted by AID. Pharynx-to-body length proportions thereby remained  
202 nearly constant even under strong tissue-specific impairment of mTORC1 signalling. We note that  
203 while pharynx-to-body proportions are retained (Fig. 3d,e), pharyngeal depletion of RAGA-1 results in  
204 a strong reduction of overall size (Fig. 3c), indicating that body size and pharynx-to-body proportions  
205 are controlled by separable mechanisms.

206 Repeating the same experiments using an AID-tagged allele of the insulin signalling receptor DAF-2  
207 instead of RAGA-1 produced near identical results. Like AID of RAGA-1, pharyngeal size deviation  
208 plateaued at less than 5% deviation despite significant growth inhibition of the pharynx (Supplemental  
209 Fig. 4). The observed robustness in pharynx length proportions is thus not a specific response to RAGA-  
210 1 inhibition, but a more general response to an imbalance in tissue growth or size. Analysis of volume  
211 instead of length led to equivalent conclusions (Supplemental Fig. 3c), with only minor quantitative  
212 differences. For pharyngeal depletion of RAGA-1, the maximal deviation of the pharyngeal volume  
213 was larger than for length (15% vs. 5%). For epidermal RAGA-1 AID, volume deviations were smaller  
214 than length deviations (-3% vs. +5%, Supplemental Fig. 3d). This difference between the effects on  
215 length and volume is explained by slightly altered body length-to-width proportions under epidermal  
216 RAGA-1 AID (Supplemental Fig. 3e).

217 We conclude that pharynx-to-body size proportions are highly robust to even strong tissue-specific  
218 inhibition of growth.

### 219 **Body growth has ultra-sensitive dependence on pharynx size**

220 To quantify the mutual relation between size and growth of pharynx and body, and to estimate how  
221 deviations from this relation would affect pharynx-to-body proportions, we compared the  
222 experimental data to the following mathematical model (Fig. 4b).

$$223 \quad \dot{b} = b * \mu_b * \sigma_b * f_b(d_p)$$

$$224 \quad \dot{p} = p * \mu_p * \sigma_p * f_p(d_p)$$

225  $\mu_p$  and  $\mu_b$  are the growth rates of pharynx size  $p$  and body size  $b$  in the absence of experimental  
226 perturbation.  $\sigma_p$  and  $\sigma_b$  indicate the degree of experimental growth inhibition ( $0 < \sigma =$   
227  $\frac{\mu_{perturbed}}{\mu_{unperturbed}} < 1$ , i.e.  $\sigma = 1$  corresponds to unperturbed growth).  $d_p = \frac{p_{perturbed}}{p_{unperturbed}}$  corresponds to  
228 the deviation from the unperturbed pharynx size proportions.  $f_b$  and  $f_p$  describe how body and  
229 pharynx growth relate to the pharyngeal size deviation  $d_p$ .

230 Experimentally,  $f_b(d_p)$  and  $f_p(d_p)$  can be determined by plotting the measured deviation from the  
231 unperturbed pharynx size  $d_p$  against the observed reduction in body or pharynx growth rates (Fig. 4a).  
232 This analysis showed that  $f_b(d_p)$  is a highly non-linear function approximating the Hill function  
233  $f_b(d_p) = \frac{1}{1+(\frac{d_p}{k})^n}$  with half-inhibition constant  $k=4.4\%$  and a Hill coefficient  $n=6.8$ .

234 Thus, we find that the measured body length growth rates rapidly drop at even very small deviations  
235 from pharynx length: body growth is reduced by more than 50% at less than 5% deviation of the  
236 pharynx length. The reverse relation  $f_p(d_p) = \frac{1}{1+(\frac{d_p}{k})^n}$  had a similar half-way point of about 5%,

237 although the available experimental data did not allow a quantitative fit to the model (Supplemental  
238 Fig. 5a). Like lengths, the relation between pharynx volume and the body growth rate is also well  
239 approximated by a Hill function (Supplemental Fig. 5b), albeit with slightly different parameters. In  
240 conclusion, under tissue-specific depletion of RAGA-1, the body growth rate has ultra-sensitive  
241 dependence on the deviations from the appropriate pharynx size and vice versa.

### 242 **Ultra-sensitive coupling of body and pharynx growth and size ensures correct pharynx size** 243 **proportions**

244 To ask if the ultra-sensitive relation between pharynx and body growth is required for the observed  
245 robustness of pharynx size proportions, we simulated pharynx and body growth by the above-  
246 described model using three different expressions for  $f_b(d_p)$  and  $f_p(d_p)$ . First, we used the fitted  
247 ultra-sensitive Hill function (see above). Second, we simulated independent growth of pharynx and  
248 body ( $f(d_p) = 1$ ), and third we modelled proportional scaling of body growth to pharynx size  
249 ( $f(d_p) = 1 - d_p$ ). Proportional scaling approximates an effect expected by a proportional limitation  
250 of food uptake due to a smaller pharynx.

251 Simulations using the measured Hill function produced good fit to the experimental data. This  
252 agreement between data and model suggests that a single Hill function  $f(d_p) = f_p(d_p) = f_b(d_p)$   
253 for all developmental stages, IAA concentrations, and tissues is sufficient to accurately describe the  
254 observed growth dynamics. Thus, stage- and condition-specific deviations from the idealized Hill  
255 function (Fig. 4a, Supplemental Fig. 5a) do not substantially contribute to the observed invariance of  
256 pharynx-to-body size proportions. Contrastingly, the two alternative models strongly deviated from  
257 the experimental observations (Fig. 4c,d). We conclude from this comparison between data and model  
258 that proportional dependence between pharynx size and growth is insufficient to explain the  
259 experimental observations. Instead, an ultra-sensitive relation between pharynx size and body growth  
260 is needed to produce the observed robustness in pharynx size proportions.

#### 261 **YAP-1 is required for the robustness of pharyngeal size proportions to epidermal growth inhibition**

262 The ultra-sensitive dependence between pharynx size and body growth suggested that pharynx-to-  
263 body length coordination involves molecular regulatory mechanisms and cannot be explained by an  
264 indirect effect of restricted nutrient uptake. To identify molecules involved, we used RNAi and genetic  
265 mutations to systematically impair canonical growth regulatory pathways. Specifically, we targeted  
266 genes associated with (i) transforming growth factor  $\beta$  (TGF $\beta$ )<sup>31</sup>, (ii) insulin and insulin-like growth  
267 factor (IIS)<sup>32</sup>, (iii) mTOR<sup>33</sup>, and (iv) Yes-associated protein/YAP signalling<sup>34</sup>. For each gene, we exposed  
268 animals with a *raga-1-aid* tag expressing Tir1 in the epidermis or in the pharynx to RNAi and imaged  
269 growth of individual animals in micro chambers. In parallel, we used a strain lacking Tir1 expression as  
270 a control for each RNAi to distinguish genes involved in a response to imbalanced tissue growth from  
271 those that are more generally involved in controlling pharynx size.

272 Our systematic analysis revealed the gene *yap-1* as essential for retaining pharynx-to-body  
273 proportions when RAGA-1 was depleted selectively in the epidermis (Fig. 5a,b). YAP-1 is the *C. elegans*  
274 ortholog of the human transcriptional co-activator YAP<sup>34</sup>, which functions as a mechano-transducer  
275 downstream of the hippo signalling pathway<sup>35</sup>. Notably, the effect on organ size proportion was  
276 specific for *yap-1* RNAi and was not observed for other genes, although we cannot exclude  
277 insufficiency of knock-down for this lack of effect (Supplemental Fig. 6). For example, we did not detect  
278 synergistic effects between RAGA-1 AID and RNAi of the TGF $\beta$  ligand *dbl-1* or its downstream effector  
279 gene *lon-1* (Fig. 5a,b and Supplemental Fig. 6b). Similarly, a null mutation of the IIS effector gene *daf-*  
280 *16* did not perturb pharynx-to-body growth coordination. Although *daf-16* mutants had a slightly  
281 reduced pharynx length under otherwise unperturbed conditions, this difference was not enhanced  
282 by tissue-specific RAGA-1 AID (Supplemental Fig. 6a). Similarly, we did not identify any RNAi that  
283 enhanced the sensitivity of pharynx-size proportions to pharyngeal RAGA-1 AID (Supplemental Fig.  
284 6a). This higher sensitivity of *yap-1(RNAi)* animals to epidermal over pharyngeal AID of RAGA-1  
285 suggests tissue-specificity in the mechanisms of organ growth coordination, although we cannot  
286 exclude that this difference is of technical origin.

#### 287 **Depletion of *yap-1* impairs larval development upon growth inhibition of the epidermis**

288 To ask if the *yap-1* dependent response to tissue-selective depletion of RAGA-1 was physiologically  
289 important, we quantified the growth and development of *yap-1(RNAi)* animals in micro chambers.  
290 Consistent with previous reports<sup>34</sup>, knock-down of *yap-1* alone did not impair development and  
291 fertility, and had only a minor impact on the overall growth rate (Fig. 5c). However, in combination  
292 with epidermal AID of RAGA-1, *yap-1(RNAi)* caused high penetrance larval arrest (Fig. 5d). This  
293 synthetic interaction between *yap-1* and epidermal RAGA-1 depletion also occurred on agar plates  
294 (Supplemental Fig. 6c). Larval arrest is therefore not caused by physical constriction of growth by the  
295 micro chambers. In conclusion, while *yap-1* is dispensable for development of *C. elegans* under  
296 standard laboratory conditions, *yap-1* is crucial under conditions of imbalanced tissue growth and for  
297 robustness of pharynx-to-body size proportions to tissue-specific perturbation of growth signalling.

## 298 Discussion

299 Using time-lapse microscopy, we have observed near perfect size uniformity of the *C. elegans* pharynx  
300 with a coefficient of variation among individuals of less than 5%. The size heterogeneity of the *C.*  
301 *elegans* pharynx is thus substantially smaller than the heterogeneity in total body volume<sup>12</sup> (Fig. 1).  
302 Indeed, unlike total body volume size deviations, pharyngeal size deviations are corrected by sub-  
303 exponential growth such that large pharynxes undergo a smaller volume fold change than small  
304 pharynxes. This relation closely mimics a so-called adder mechanism, where the added volume per  
305 larval stage is independent of the volume at the beginning of the larval stage (Fig. 2). Adders were  
306 previously observed in bacteria, yeasts, and mammalian cells<sup>7,9,36</sup>. However, despite these  
307 phenomenological parallels, uni-cellular and multi-cellular adders are likely mechanistically distinct.  
308 Unlike cellular adders, which function cell autonomously, the systemic effects of tissue-specific growth  
309 inhibition suggest that pharyngeal size homeostasis involves communication among different tissues  
310 with each other (Fig. 3).

311 Since the pharynx is crucially involved in food uptake, deviations in its size may passively invoke a  
312 systemic effect on body growth. Food uptake is indeed likely to contribute to the robustness of  
313 pharyngeal size proportions, but multiple lines of evidence show that the robustness we observed  
314 involves additional mechanisms. First, endogenous fluctuations in the pharynx size were uncorrelated  
315 to overall body growth, suggesting that the pharynx size is not limiting for body growth within the  
316 endogenously observed range (Supplemental Fig. 2e). Second, we observe an ultra-sensitive response  
317 of body growth to pharynx size, where reducing pharynx length by only 5% caused a reduction of total  
318 body growth by more than 50%. This finding is difficult to reconcile with a mechanism based on food  
319 limitation alone. Indeed, simulations show that this ultra-sensitive response is required to produce  
320 the observed robustness of pharynx-to-body proportions to growth inhibition (Fig. 4). Third, we show  
321 that depletion of the gene *yap-1* impairs the robustness of pharynx-to-body proportions to tissue-  
322 specific growth inhibition. All these findings argue against a purely passive mechanism through food  
323 uptake and suggest a mechanism involving molecular regulation (Fig. 5).

324 In *C. elegans*, *yap-1* has previously been implicated in cell polarity<sup>37,38</sup> and in the regulation of  
325 aging<sup>34,39</sup>. However, a role for *yap-1* in organ growth and size control of *C. elegans*, had not been  
326 characterized so far. We show a function of YAP-1 in organ growth coordination that becomes  
327 apparent under spatial imbalance of mTORC1 signalling. RNAi of other genes of the Hippo pathway  
328 did not impair pharynx-to-body size proportions (*ftt-2/14-3-3* and *wts-1/Hippo* kinase). However,  
329 based on the function of their human orthologs, these genes are likely negative regulators of YAP-1,  
330 such that their genetic depletion would hyperactivate *yap-1*<sup>34</sup> rather than phenocopy its depletion.  
331 Future experiments will differentiate Hippo kinase dependent and independent regulation of YAP-1 in  
332 *C. elegans*.



333 Consistent with our results, the *Drosophila* homolog of YAP-1 (called Yorkie) transcriptionally controls  
334 the relaxin-like hormone *dilp8*, a systemic growth regulator of *Drosophila* larvae<sup>40</sup>. *C. elegans* YAP-1  
335 may similarly act upstream of hormonal control, or directly control the transcription of growth-related  
336 genes. Fly and mammalian YAP-1 orthologs respond to a variety of mechanical stimuli. Since the  
337 gastro-intestinal tract of *C. elegans* is attached to the exoskeletal cuticle, changes in pharyngeal length  
338 are likely to create mechanical forces between cells and tissues, or between cells and the cuticle. Thus,  
339 an attractive model for the ultra-sensitive coupling between pharynx and body growth is that marginal  
340 disproportions between tissues create pulling forces between them, leading to YAP-1 regulation. An  
341 important open question is how cells quantitatively convert such forces into an appropriate response  
342 in gene expression and growth, which can now be addressed in the context of an entire living animal.

## 343 **Materials and Methods**

### 344 *List of strains used in this study*

345 All strains used in this study were created by genetic crosses from the following previously published  
346 alleles: *bqSi577*<sup>41</sup>, *wbmls88*<sup>42</sup>, *ieSi60*<sup>23</sup>, *daf-2(bch40)*<sup>43</sup>, *raga-1(wbm40)*<sup>26</sup>, *reSi1*<sup>27</sup>, *xeSi376*<sup>23</sup>, *daf-*  
347 *16(mu86)*<sup>44</sup>.

wBT125 *bqSi577 [myo-2p::gfp] IV.; wbmls88 [eft-3p::3xflag::dpy-10  
crRNA::sl2::wrmscarlet::unc-54 3' UTR] V.*

wBT137 *ieSi60 [myo-2p::tir1::mruby::unc-54 3'UTR] II.; daf-2(bch40 [aid::3xflag::STOP::sl2-  
sv40::wrmscarlet-nls]) III; bqSi577 [myo-2p::gfp] IV.; wbmls88 [eft-3p::3xflag::dpy-10  
crRNA::sl2::wrmscarlet::unc-54 3' UTR] V.*

wBT160 *raga-1(wbm40 [raga-1::aid::gfp]) II.; bqSi577 [myo-2p::gfp] IV.; wbmls88 [eft-  
3p::3xflag::dpy-10 crRNA::sl2::wrmscarlet::unc-54 3' UTR] V.*

wBT182 *raga-1(wbm40 [raga-1::aid::gfp]) ieSi60[myo-2p::tir1::mruby::unc-54 3'UTR] II.;  
bqSi577 [myo-2p::gfp] IV.; wbmls88 [eft-3p::3xflag::dpy-10  
crRNA::sl2::wrmscarlet::unc-54 3' UTR] V.*

wBT186 *reSi1 [col-10p::tir1::f2a::mtagbfp2::nls::aid::tbb-2 3'UTR] I.; raga-1(wbm40 [raga-  
1::aid::gfp]) II.;bqSi577 [myo-2p::gfp] IV.; wbmls88 [eft-3p::3xflag::dpy-10  
crRNA::sl2::wrmscarlet::unc-54 3' UTR] V.*

wBT190 *raga-1(wbm40 [raga-1::aid::gfp]) II.; xeSi376[eft-3p::tir1::mruby::unc-54 3'UTR ] III.;  
bqSi577 [myo-2p::gfp] IV.; wbmls88 [eft-3p::3xflag::dpy-10  
crRNA::sl2::wrmscarlet::unc-54 3' UTR] V.*

wBT258 *daf-16(mu86) I.; raga-1(wbm40 [raga-1::aid::gfp]) ieSi60[myo-2p::tir1::mruby::unc-54  
3'UTR] II.; bqSi577 [myo-2p::gfp] IV.; wbmls88 [eft-3p::3xflag::dpy-10  
crRNA::sl2::wrmscarlet::unc-54 3' UTR] V.*

wBT263 *daf-16(mu86) I. raga-1(wbm40 [raga-1::aid::gfp]) II.; bqSi577 [myo-2p::gfp] IV.;  
wbmls88 [eft-3p::3xflag::dpy-10 crRNA::sl2::wrmscarlet::unc-54 3' UTR] V.*

wBT264 *reSi1 [col-10p::tir1::f2a::mtagbfp2::nls::aid::tbb-2 3'UTR] daf-16(mu86) I.; raga-  
1(wbm40 [raga-1::aid::gfp]) II.;bqSi577 [myo-2p::gfp] IV.; wbmls88 [eft-  
3p::3xflag::dpy-10 crRNA::sl2::wrmscarlet::unc-54 3' UTR] V.*

348

### 349 *Micro chamber preparation*

350 Micro chambers were manufactured as described in<sup>12</sup> using a master PDMS mould as a micro comb  
351 to produce wells in a 4.5% Agarose gel in S-basal. For all experiments, chamber dimensions were  
352 600x600x20µm. As a food source, the bacterial strain OP50-1 was grown on NGM plates by standard  
353 methods, scraped off using a piece of agar and then filled into the wells of the agarose gel. Wells were  
354 filled with eggs at 2-fold stage and subsequently inverted onto a dish of 3.5cm diameter with high

355 optical quality gas-permeable polymer bottom (ibidi). The remaining surface of the dish was covered  
356 with 3% low melting temperature Agarose dissolved in S-basal (cooled down to below 42 °C prior to  
357 application). The agarose was overlaid with ~0.5ml polydimethylsiloxane (PDMS) and the dish was  
358 sealed with parafilm to prevent excessive evaporation. PDMS was allowed to cure at room  
359 temperature on the microscope during the acquisition. Using a custom-made plate holder, six dishes  
360 could be imaged simultaneously on one microscope. Auxin (IAA, Sigma) solutions were freshly  
361 prepared on the day of the experiment as a 400x stock in EtOH and subsequently diluted to the  
362 indicated concentration in agarose to a final EtOH concentration of 0.25% immediately prior to use  
363 for micro chamber assembly.

#### 364 *Imaging*

365 All experiments were performed on a Nikon Ti2 epifluorescence microscope using a 10x objective with  
366 NA=0.45 and a Hamamatsu ORCA Flash 4 sCMOS camera. Temperature was maintained at 25 +/-0.1  
367 °C by incubator enclosing the entire microscope and a feedback controlled temperature regulator (ICE  
368 cube, life imaging services). Separately triggerable LEDs (SpectraX, lumencore) for 491nm (GFP) and  
369 for 575nm (mCherry/mScarlet) were used as an excitation light source that was TTL-triggered to  
370 ensure rapid switching between wavelengths and thus imaging of red and green fluorescence within  
371 10ms. Acquisition times were kept below 10ms, such that two color imaging could be completed  
372 within 30ms. Rapid image registration was crucial to minimize a shift between fluorescent channels in  
373 the absence of physical or chemical immobilization of the animals. Software autofocus as provided by  
374 Nikon's NIS software was used every 10 minutes using 575nm excitation at low intensity. We  
375 confirmed that these acquisition settings did not impair growth, development, and fertility of animals.

#### 376 *Image analysis*

377 A custom-made Matlab script was used to segment worms and pharynxes from raw fluorescent  
378 images. For treatment of the total body of worms, all procedures were identical to those previously  
379 described<sup>12</sup>. For the pharynx, a pixel classifier was trained using Ilastik<sup>45</sup> on the green fluorescent  
380 channel. Segmentations of body and pharynx were subsequently straightened<sup>12</sup> using the body  
381 outline as a template. Pharyngeal and body volume and length were computed from these  
382 straightened images assuming rotational symmetry<sup>22</sup>. A decision tree based classifier<sup>12</sup> was used to  
383 determine the time point of hatching, and to identify time points where straightening failed (e.g. due  
384 to self-touching animals). Detection of moults and computation of growth rates was conducted as  
385 previously described using a custom-made Matlab script<sup>12</sup>. Trendlines in scatter plots were computed  
386 using robust linear regression using the robustfit() method of Matlab (v2021b) and default  
387 parameters. We thereby reduce sensitivity to outliers.

#### 388 *RNAi*

389 All RNAi experiments were conducted by feeding using HTT115 clones retrieved from available  
390 libraries<sup>46,47</sup> and validated by Sanger sequencing. (clone numbers: *dbl-1*: sjj\_T25F10.2; *lon-1*:  
391 sjj\_F48E8.1, *yap-1*: sjj\_F13E6.4, *ftt-2*: sjj\_F52D10.3, *wts-1*: sjj\_T20F10.1, *rsk-1*: sjj2\_Y47D3A.16). RNAi  
392 was initiated on plates one generation prior to loading in micro chambers. For RNAi plate preparation,  
393 bacterial clones were grown to saturation over night in LB with Ampicillin (100µg/ml) and dispensed  
394 on NGM plates containing 1mM IPTG and 50µg/ml Carbenicillin. L4 stage animals grown  
395 on OP50-1 were transferred to RNAi plates and their embryonic progeny was transferred into micro  
396 chambers containing bacteria expressing the same RNAi clone using an eyelash glued to a pipette tip.  
397 For RNAi inside micro chambers, bacterial over night cultures were induced in liquid for 4h using 4mM  
398 IPTG, concentrated by centrifugation, and dispensed onto NGM plates containing 1mM IPTG and

399 50µg/ml Carbenicillin. After drying, bacteria were scraped off the plate and used as described above  
400 for OP50-1.

#### 401 *Comparison of observed growth to randomized simulations*

402 Simulations were performed as described<sup>12</sup> and started with the measured distribution of pharynx  
403 volume after hatching and each individual was assigned one of the following parameters randomly  
404 selected from the experimentally measured distributions, depending on the simulation: i) a  
405 pharyngeal growth rate and a larval stage duration (independently randomized), ii) the volume fold  
406 change, iii) the volume added within one larval stage. From these randomly selected parameters the  
407 pharyngeal volume of the next larval stage was computed and the process was iterated until the end  
408 of L4. Each randomization was repeated 1000 times for each day-to-day repeat and the pooled for  
409 visualization. To exclude effects of large heterogeneity in pharyngeal volume at hatch, randomizations  
410 were also started at the end of L1 instead of at hatching, which yielded equivalent conclusions.

#### 411 *Averaging of growth rates and volumes after re-scaling*

412 To average trajectories of growth rates, volume, and length without perturbing alignment of moults  
413 individual trajectories were re-scaled to the larval stage duration and averaged after interpolation at  
414 100 points per larval stage. Data was then averaged over all individuals at each of the 100 points per  
415 larval stage, and the averaged data was rescaled to the average larval stage duration.

#### 416 *Computation of width and growth rates*

417 Unless indicated otherwise, average growth rates per larval stage were calculated as the difference  
418 between the natural logarithm of the volume at the beginning and the end of the larval stage divided  
419 by the larval stage duration ( $\mu = \Delta \log(V)/\Delta t$ ). Average width ( $w$ ) of body and pharynx was calculated  
420 from volume  $v$  and length  $l$  as follows:  $w = 2\sqrt{v/(\pi l)}$ .

#### 421 **Author contributions**

422 BDT and KS conceived the study, all experiments except those mentioned below were executed by KS.  
423 Experiments in Figure 1 were conducted by BDT, experiments in Figure 6c were conducted by IG. BDT  
424 and KS analysed the data. BDT designed and analysed the mathematical model. WBM and AL created  
425 and validated the *raga-1-aid* allele. KS and IG created the strains used for the study. BDT wrote the  
426 manuscript. KS and WMB edited the manuscript.

#### 427 **Acknowledgements**

428 We are thankful to Cihan Elci for technical assistance and to Rutger Hermsen and Helge Grosshans for  
429 useful discussions and helpful feedback on the manuscript. We acknowledge support by the  
430 Microscopy Imaging Center at the University of Bern. This work received funding from the Swiss  
431 National Science Foundation (SNSF) in the form of an Eccellenza Professorial Fellowship  
432 (PCEFP3\_181204) to B.D.T. and from the Novartis Foundation for Medical-Biological Research (Grant  
433 #20A011) Some strains were provided by the CGC, which is funded by NIH Office of Research  
434 Infrastructure Programs (P40 OD010440).

#### 435 **References**

436 1. Maron, B. J. Clinical Course and Management of Hypertrophic Cardiomyopathy. *N Engl J Med*  
437 **379**, 655–668 (2018).

- 438 2. Rosenblum, S., Pal, A. & Reidy, K. Renal development in the fetus and premature infant.  
439 *Seminars in Fetal and Neonatal Medicine* **22**, 58–66 (2017).
- 440 3. Chandra, V., Kim, J. J., Benbrook, D. M., Dwivedi, A. & Rai, R. Therapeutic options for  
441 management of endometrial hyperplasia. *J Gynecol Oncol* **27**, (2016).
- 442 4. Das, K. & Buchholz, N. Benign prostate hyperplasia and nutrition. *Clinical Nutrition ESPEN* **33**,  
443 5–11 (2019).
- 444 5. Andersen, D. S., Colombani, J. & Léopold, P. Coordination of organ growth: principles and  
445 outstanding questions from the world of insects. *Trends in Cell Biology* **23**, 336–344 (2013).
- 446 6. Gokhale, R. H. & Shingleton, A. W. Size control: the developmental physiology of body and  
447 organ size regulation. *WIREs Developmental Biology* **4**, 335–356 (2015).
- 448 7. Campos, M. *et al.* A Constant Size Extension Drives Bacterial Cell Size Homeostasis. *Cell* **159**,  
449 1433–1446 (2014).
- 450 8. Soifer, I., Robert, L. & Amir, A. Single-Cell Analysis of Growth in Budding Yeast and Bacteria  
451 Reveals a Common Size Regulation Strategy. *Current Biology* **26**, 356–361 (2016).
- 452 9. Taheri-Araghi, S. *et al.* Cell-Size Control and Homeostasis in Bacteria. *Current Biology* **25**, 385–  
453 391 (2015).
- 454 10. Xie, S. & Skotheim, J. M. A G1 Sizer Coordinates Growth and Division in the Mouse Epidermis.  
455 *Current Biology* **30**, 916–924.e2 (2020).
- 456 11. Schmoller, K. M. & Skotheim, J. M. The Biosynthetic Basis of Cell Size Control. *Trends in Cell*  
457 *Biology* **25**, 793–802.
- 458 12. Stojanovski, K., Großhans, H. & Towbin, B. D. Coupling of growth rate and developmental  
459 tempo reduces body size heterogeneity in *C. elegans*. *Nat Commun* **13**, 3132 (2022).
- 460 13. Vollmer, J., Casares, F. & Iber, D. Growth and size control during development. *Open Biology*  
461 **7**, (2017).
- 462 14. Averbukh, I., Ben-Zvi, D., Mishra, S. & Barkai, N. Scaling morphogen gradients during tissue  
463 growth by a cell division rule. *Development* **141**, 2150–2156 (2014).
- 464 15. Boulan, L., Milán, M. & Léopold, P. The Systemic Control of Growth. *Cold Spring Harb Perspect*  
465 *Biol* **7**, a019117 (2015).
- 466 16. Colombani, J. *et al.* A nutrient sensor mechanism controls *Drosophila* growth. *Cell* **114**, 739–  
467 749 (2003).
- 468 17. Colombani, J., Andersen, D. S. & Léopold, P. Secreted Peptide Dilp8 Coordinates *Drosophila*  
469 Tissue Growth with Developmental Timing. *Science* **336**, 582–585 (2012).
- 470 18. Garelli, A., Gontijo, A. M., Miguela, V., Caparros, E. & Dominguez, M. Imaginal Discs Secrete  
471 Insulin-Like Peptide 8 to Mediate Plasticity of Growth and Maturation. *Science* **336**, 579–582 (2012).
- 472 19. Roselló-Díez, A., Madisen, L., Bastide, S., Zeng, H. & Joyner, A. L. Cell-nonautonomous local  
473 and systemic responses to cell arrest enable long-bone catch-up growth in developing mice. *PLOS*  
474 *Biology* **16**, e2005086 (2018).

- 475 20. Baron, J. *et al.* Catch-up growth after glucocorticoid excess: a mechanism intrinsic to the  
476 growth plate. *Endocrinology* **135**, 1367–1371 (1994).
- 477 21. Dupont, S. *et al.* Role of YAP/TAZ in mechanotransduction. *Nature* **474**, 179–183 (2011).
- 478 22. Gritti, N., Kienle, S., Filina, O. & van Zon, J. S. Long-term time-lapse microscopy of *C. elegans*  
479 post-embryonic development. *Nature Communications* **7**, 12500 (2016).
- 480 23. Zhang, L., Ward, J. D., Cheng, Z. & Dernburg, A. F. The auxin-inducible degradation (AID)  
481 system enables versatile conditional protein depletion in *C. elegans*. *Development* **142**, 4374 (2015).
- 482 24. Sancak, Y. *et al.* Ragulator-Rag Complex Targets mTORC1 to the Lysosomal Surface and Is  
483 Necessary for Its Activation by Amino Acids. *Cell* **141**, 290–303 (2010).
- 484 25. Binda, M. *et al.* The Vam6 GEF controls TORC1 by activating the EGO complex. *Mol Cell* **35**,  
485 563–573 (2009).
- 486 26. Smith, H. J. *et al.* Neuronal mTORC1 inhibition promotes longevity without suppressing  
487 anabolic growth and reproduction in *C. elegans*. 2021.08.12.456148 (2021)  
488 doi:10.1101/2021.08.12.456148.
- 489 27. Ashley, G. *et al.* An expanded auxin-inducible degron toolkit for *Caenorhabditis elegans*.  
490 *Genetics* (2021) doi:10.1093/genetics/iyab006.
- 491 28. Hills-Muckey, K. *et al.* An engineered, orthogonal auxin analog/AtTIR1(F79G) pairing improves  
492 both specificity and efficacy of the auxin degradation system in *Caenorhabditis elegans*. *Genetics* **220**,  
493 iyab174 (2022).
- 494 29. Negishi, T. *et al.* The auxin-inducible degron 2 (AID2) system enables controlled protein  
495 knockdown during embryogenesis and development in *Caenorhabditis elegans*. *Genetics* **220**, iyab218  
496 (2022).
- 497 30. Chisholm, A. D. & Hsiao, T. I. The *Caenorhabditis elegans* epidermis as a model skin. I:  
498 development, patterning, and growth. *WIREs Developmental Biology* **1**, 861–878 (2012).
- 499 31. Savage-Dunn, C. & Padgett, R. W. The TGF- $\beta$  Family in *Caenorhabditis elegans*. *Cold Spring*  
500 *Harb Perspect Biol* **9**, (2017).
- 501 32. Murphy, C. T. & Hu, P. J. Insulin/insulin-like growth factor signaling in *C. elegans*. (WormBook,  
502 2018).
- 503 33. Blackwell, T. K., Sewell, A. K., Wu, Z. & Han, M. TOR Signaling in *Caenorhabditis elegans*  
504 Development, Metabolism, and Aging. *Genetics* **213**, 329–360 (2019).
- 505 34. Iwasa, H. *et al.* Yes-associated protein homolog, YAP-1, is involved in the thermotolerance and  
506 aging in the nematode *Caenorhabditis elegans*. *Experimental Cell Research* **319**, 931–945 (2013).
- 507 35. Chang, Y.-C., Wu, J.-W., Wang, C.-W. & Jang, A. C.-C. Hippo Signaling-Mediated  
508 Mechanotransduction in Cell Movement and Cancer Metastasis. *Frontiers in Molecular Biosciences* **6**,  
509 (2020).
- 510 36. Cadart, C. *et al.* Size control in mammalian cells involves modulation of both growth rate and  
511 cell cycle duration. *Nature Communications* **9**, 3275 (2018).

- 512 37. Lee, H., Kang, J., Ahn, S. & Lee, J. The Hippo Pathway Is Essential for Maintenance of Apicobasal  
513 Polarity in the Growing Intestine of *Caenorhabditis elegans*. *Genetics* **213**, 501–515 (2019).
- 514 38. Lee, H., Kang, J. & Lee, J. Involvement of YAP-1, the Homolog of Yes-Associated Protein, in the  
515 Wnt-Mediated Neuronal Polarization in *Caenorhabditis elegans*. *G3 Genes/Genomes/Genetics* **8**,  
516 2595–2602 (2018).
- 517 39. Teuscher, A. C. *et al.* Mechanotransduction coordinates extracellular matrix protein  
518 homeostasis promoting longevity in *C. elegans*. *bioRxiv* 2022.08.30.505802 (2022)  
519 doi:10.1101/2022.08.30.505802.
- 520 40. Boone, E., Colombani, J., Andersen, D. S. & Léopold, P. The Hippo signalling pathway  
521 coordinates organ growth and limits developmental variability by controlling *dilp8* expression. *Nat*  
522 *Commun* **7**, 1–8 (2016).
- 523 41. Muñoz-Jiménez, C. *et al.* An Efficient FLP-Based Toolkit for Spatiotemporal Control of Gene  
524 Expression in *Caenorhabditis elegans*. *Genetics* **206**, 1763–1778 (2017).
- 525 42. Silva-García, C. G. *et al.* Single-Copy Knock-In Loci for Defined Gene Expression in  
526 *Caenorhabditis elegans*. *G3 Genes/Genomes/Genetics* **9**, 2195–2198 (2019).
- 527 43. Venz, R., Pekec, T., Katic, I., Ciosk, R. & Ewald, C. Y. End-of-life targeted auxin-mediated  
528 degradation of DAF-2 Insulin/IGF-1 receptor promotes longevity free from growth-related  
529 pathologies. *eLife* **10**, e71335 (2021).
- 530 44. Lin, K., Dorman, J. B., Rodan, A. & Kenyon, C. *daf-16*: An HNF-3/forkhead Family Member That  
531 Can Function to Double the Life-Span of *Caenorhabditis elegans*. *Science* **278**, 1319–1322 (1997).
- 532 45. Berg, S. *et al.* *ilastik*: interactive machine learning for (bio)image analysis. *Nat Methods* **16**,  
533 1226–1232 (2019).
- 534 46. Kamath, R. S. *et al.* Systematic functional analysis of the *Caenorhabditis elegans* genome using  
535 RNAi. *Nature* **421**, 231 (2003).
- 536 47. Rual, J.-F. *et al.* Toward Improving *Caenorhabditis elegans* Phenome Mapping With an  
537 ORFeome-Based RNAi Library. *Genome Res* **14**, 2162–2168 (2004).
- 538

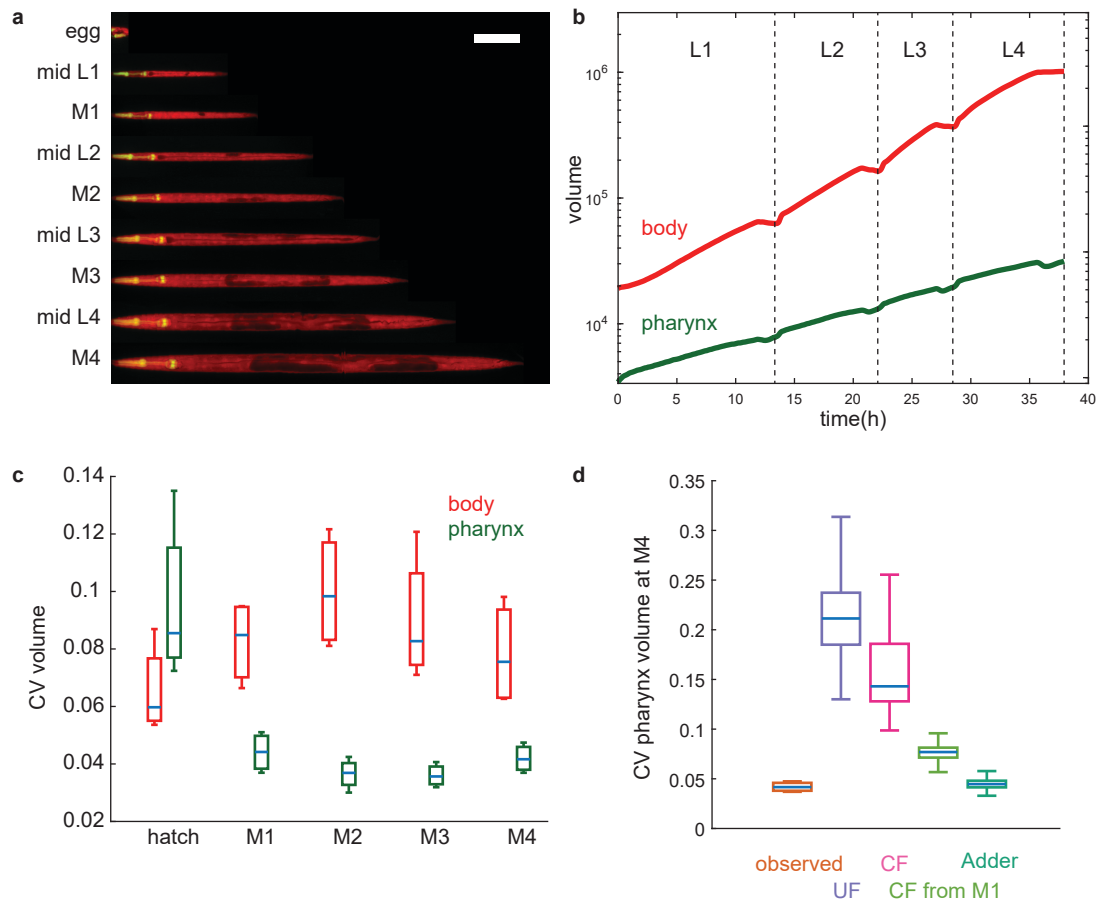

Figure 1

539 **Figure 1. Pharyngeal volume is less heterogeneous among individuals than total body volume**

- 540 a. Individual animal imaged in micro chambers at indicated developmental milestones. Merged  
541 image of pharynx in green (*myo-2p:gfp*) and total body in red (*eft-3p:mscarlet*) is shown.  
542 Overlay of green and red is shown as yellow. *eft-3p:mscarlet* is comparatively weak in the  
543 head region in young L1 animals, producing a more green appearance of the pharynx at this  
544 stage. Contrast was adjusted for each time point individually. Animals were straightened  
545 computationally. Scale bar: 100 $\mu$ m
- 546 b. Body (red) and pharynx (green) volume as a function of time averaged from n = 475  
547 individuals. For averaging, individuals of each larval stage were re-scaled to have matching  
548 larval stage entry and exit points and the growth curve was scaled back to the mean larval  
549 stage duration after averaging.
- 550 c. Coefficient of variation (CV) of body (red) and pharynx (green) volume at hatch and larval  
551 moults (M1 to M4). Box plots represent CVs of 4 independent day-to-day repeats with 105 <  
552 n < 181 individuals per repeat.
- 553 d. Comparison of observed CV of pharyngeal volume to randomized simulations as described in  
554 the main text. UF: uncoupled folder, CF: coupled folder, CF from M1: CF starting at M1. p-  
555 value (one-sided t-test) for observed vs. model: UF: 0.0007, CF: 0.0083, CF from M1: 10<sup>-5</sup>,  
556 Adder: 0.04. Boxplots in c,d: central line: median, box: interquartile ranges (IQR), whisker:  
557 ranges except extreme outliers (>1.5\*IQR)



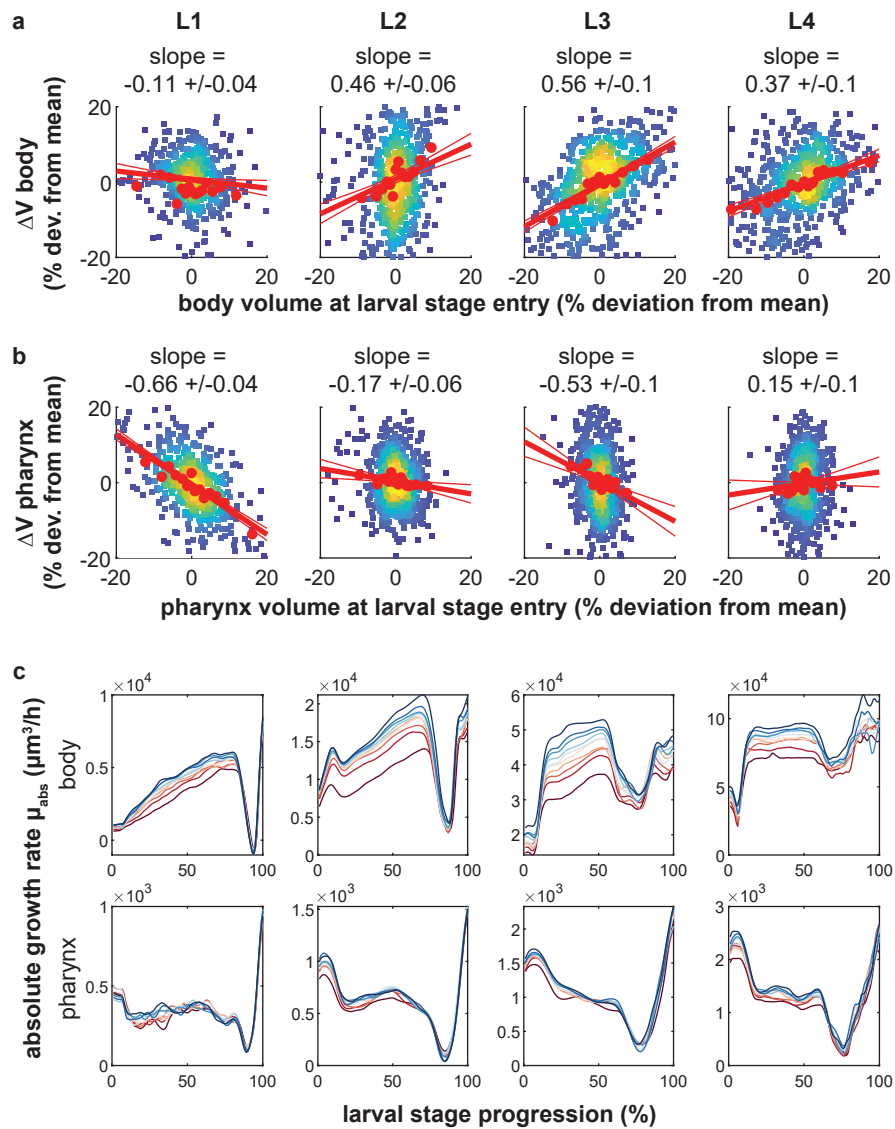

Figure 2

558 **Figure 2. Linear pharyngeal volume growth within larval stages produces and adder-like behaviour**

- 559 a. Scatter plot of body volume at larval stage entry vs. added body volume per larval stage for  
560 each individual. Red circles: binned average along x-Axis. red line: robust linear regression  
561 (thick) with 95% confidence intervals (thin). Data is shown as relative deviation to the batch  
562 mean. Rare outliers beyond the +/- 20% range are omitted for clarity. Value above chart  
563 indicates slope of regression line +/- 95% CI
- 564 b. As a., but for pharyngeal volume.
- 565 c. Absolute rate of body (top) and pharynx (bottom) volume increase as a function of larval stage  
566 progression. Individuals were binned into 10 classes according to their volume at 40% of each  
567 stage (red is the smallest volume, blue the largest volume). Individuals were re-scaled from  
568 moult to moult before averaging. The drop in growth rate at 80-90% of the larval stage  
569 represents growth halt during lethargus.
- 570 a-c. n = 475,641, 641, 638 individuals for L1 to L4 from 4 day-to-day repeats.

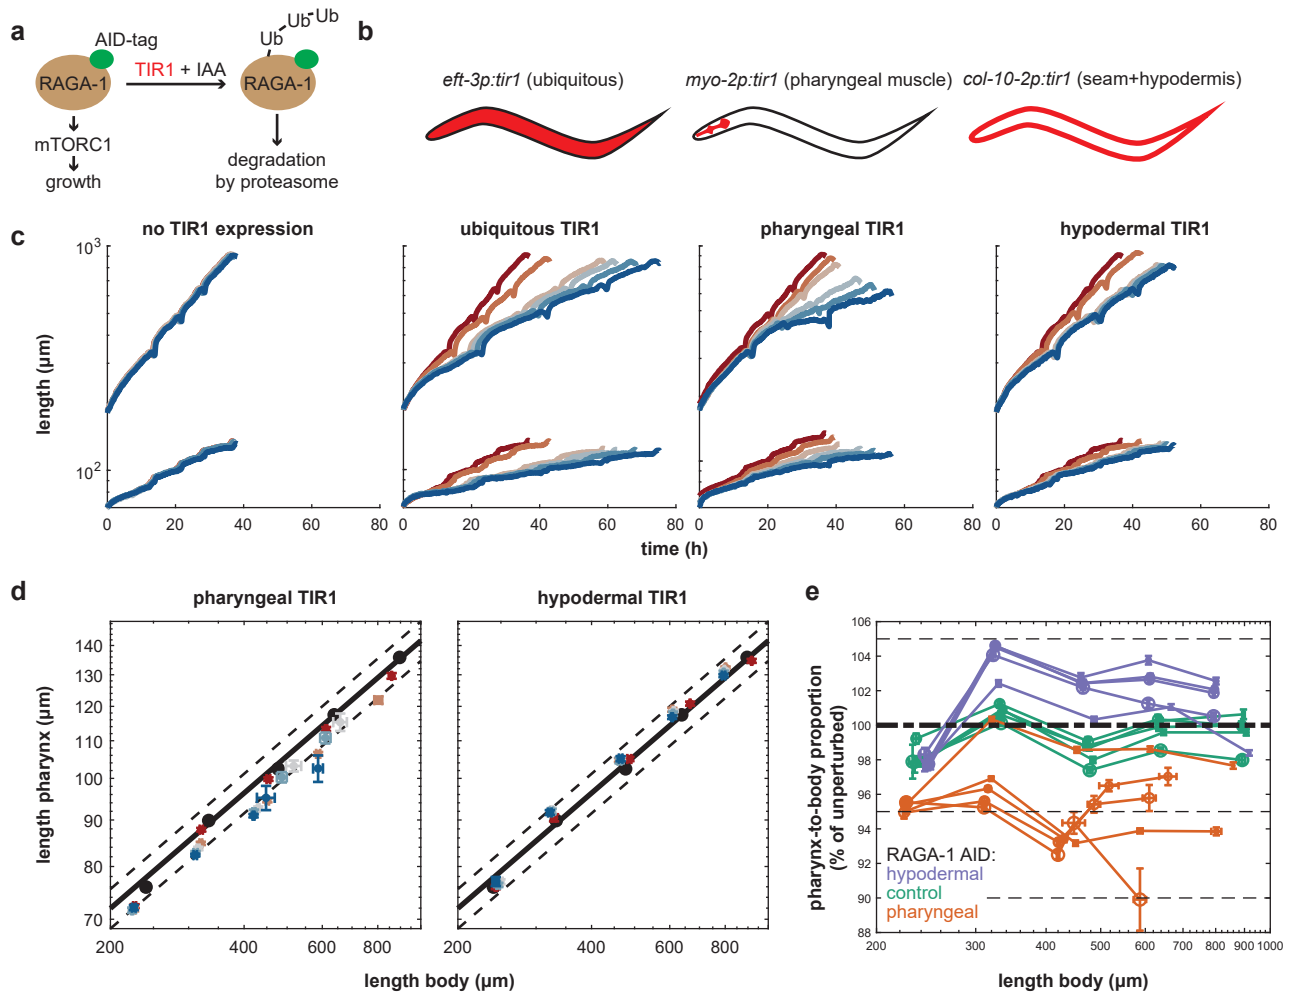

571 **Figure 3. Pharynx-to-body length proportions are robust to tissue-specific depletion of RAGA-1**

- 572 a. Experimental approach to deplete RAGA-1 in selected tissues. An AID tag was inserted into  
573 the endogenous locus of the *raga-1* gene and Tir1 was expressed ubiquitously or under tissue-  
574 specific promoters. Addition of auxin to the growth medium leads to ubiquitination and  
575 proteasomal degradation of RAGA-1 in tissues expressing Tir1.
- 576 b. Schematic representation of tissue-specific promoters used to express the Tir1 enzyme.
- 577 c. Body (top) and pharynx (bottom) length as a function time with depletion of RAGA-1 in  
578 indicated tissues. Color indicates IAA concentration from red to blue: no Tir1 expression 0mM  
579 IAA, Tir1 expression + 0mM, 0.1mM, 0.25mM, 0.5mM, 1mM IAA. Number individuals  $n$ ,  $26 <$   
580  $n < 259$  from number of day-to-day repeats  $m$ ,  $3 < m < 11$ . See Supplemental Tables 1 and 2  
581 for  $n$  and  $m$  of each condition.
- 582 d. Scatter plot showing body vs. pharynx length at the beginning of L1 and at all larval moults  
583 M1 to M4 (circles in order from left to right) under pharyngeal (left) or epidermal (right) AID  
584 of RAGA-1. black circles: relation between pharynx and body length when unperturbed (no  
585 Tir1 expression and no IAA). Solid black line: linear regression to unperturbed body-to-pharynx  
586 length (P-line). Dashed black line: 5% deviation from P-line. Coloured circles: IAA  
587 concentrations from red to blue: 0, 100, 250, 500, 1000 $\mu$ M. Error bars are standard error of  
588 the mean among day-to-day repeats.
- 589 e. Deviation of pharynx-to-body length ratio (deviation from P-line) vs. body length at early L1  
590 and larval moults. Colours indicate different Tir1 expression; orange: pharynx, purple:  
591 epidermis, green: no Tir1 expression. Circle size indicates IAA concentration from 0mM  
592 (smallest circle) to 1mM (largest circle) as indicated in d. Error bars are standard errors among  
593 day-to-day repeats.

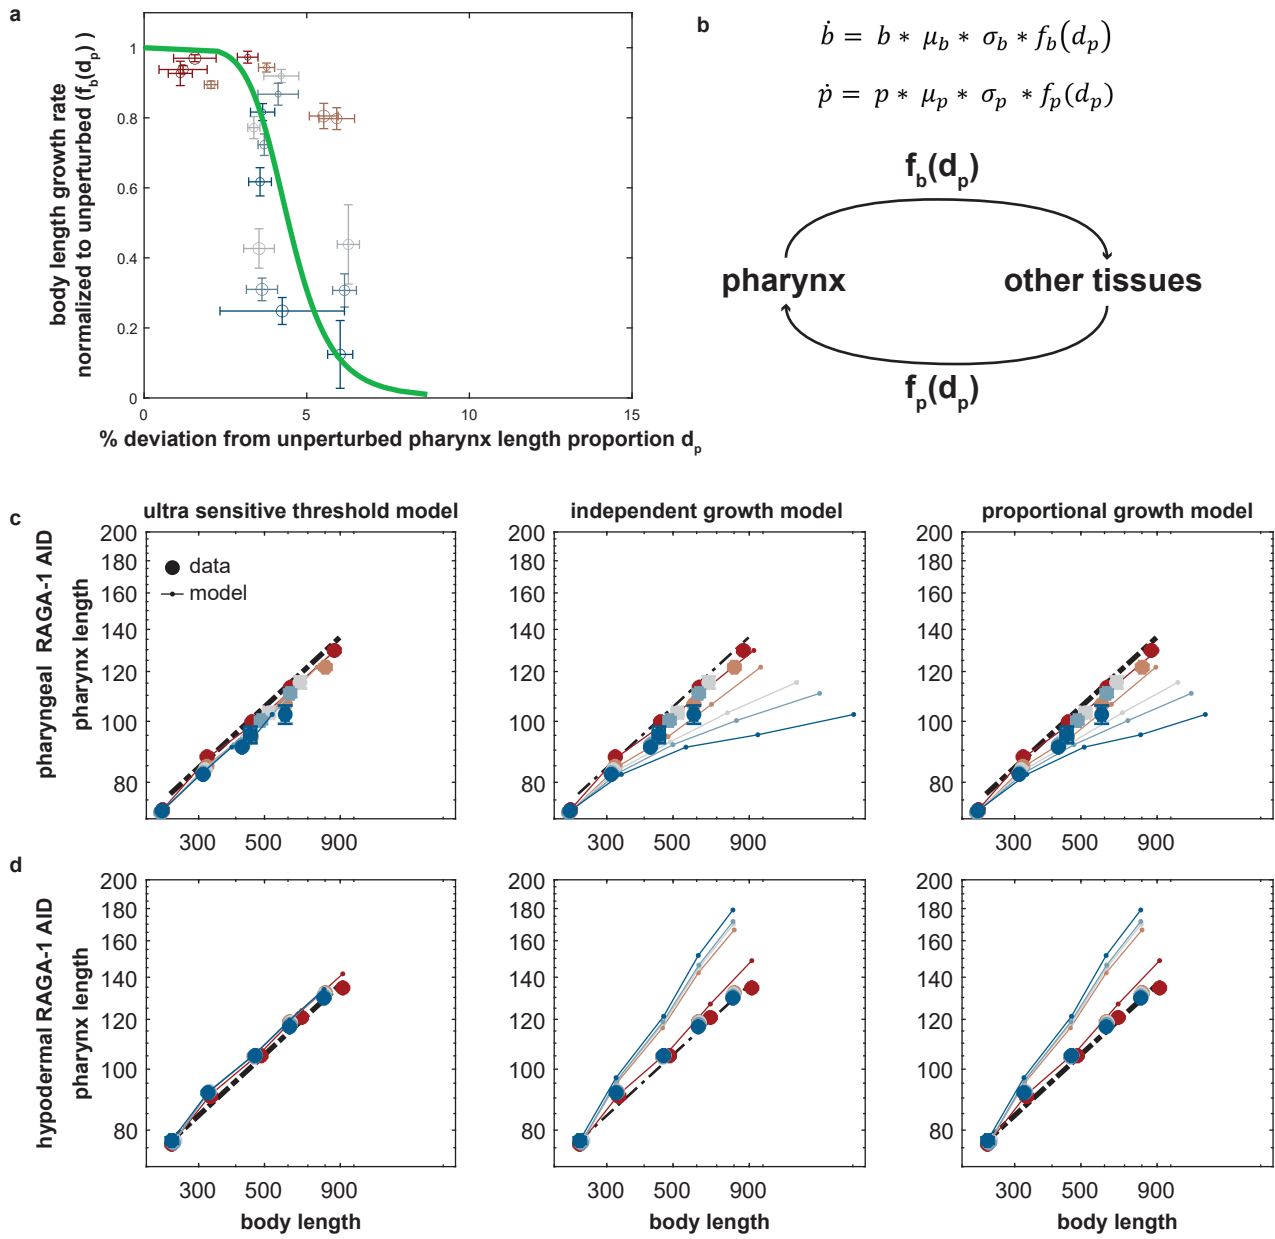

Figure 4

594 **Figure 4. An ultra-sensitive relation between pharynx size and body growth is required for**  
595 **robustness of pharynx-to-body length proportions to tissue-specific growth inhibition**

- 596 a. Body length growth rate ( $\Delta \log(\text{len})/\Delta t$ ) as a function of deviation of pharynx length  $d_p$  from  
597 the P-line under pharyngeal growth inhibition. Growth is normalized to unperturbed growth.  
598 Colour indicates IAA concentration increasing from red (0 mM) to blue (1 mM). Circle size  
599 indicates the larval stage (L1 being the smallest). Green line is a fitted Hill function as described  
600 in the main text.
- 601 b. Schematic illustration of mathematical model as described in the text.
- 602 c. Comparison of experimental data (solid circles) from pharyngeal RAGA-1 AID to three  
603 different models (thin lines) as described in the main text with  $f_p(d_p) = \frac{1}{1+(\frac{d_p}{k})^n}$  (left),  
604  $f(d_p) = 1$  (middle),  $f(d_p) = 1 - d_p$  (right). Colours as in a. The ultra-sensitive threshold  
605 model, but not proportional or the independent model fit the data.
- 606 d. As c., but for epidermal RAGA-1 AID.
- 607 a,c,d. error bars in vertical and horizontal direction indicate standard error of the mean between  
608 day-to-day repeats. Absence of error bars means that they were smaller than the marker size.

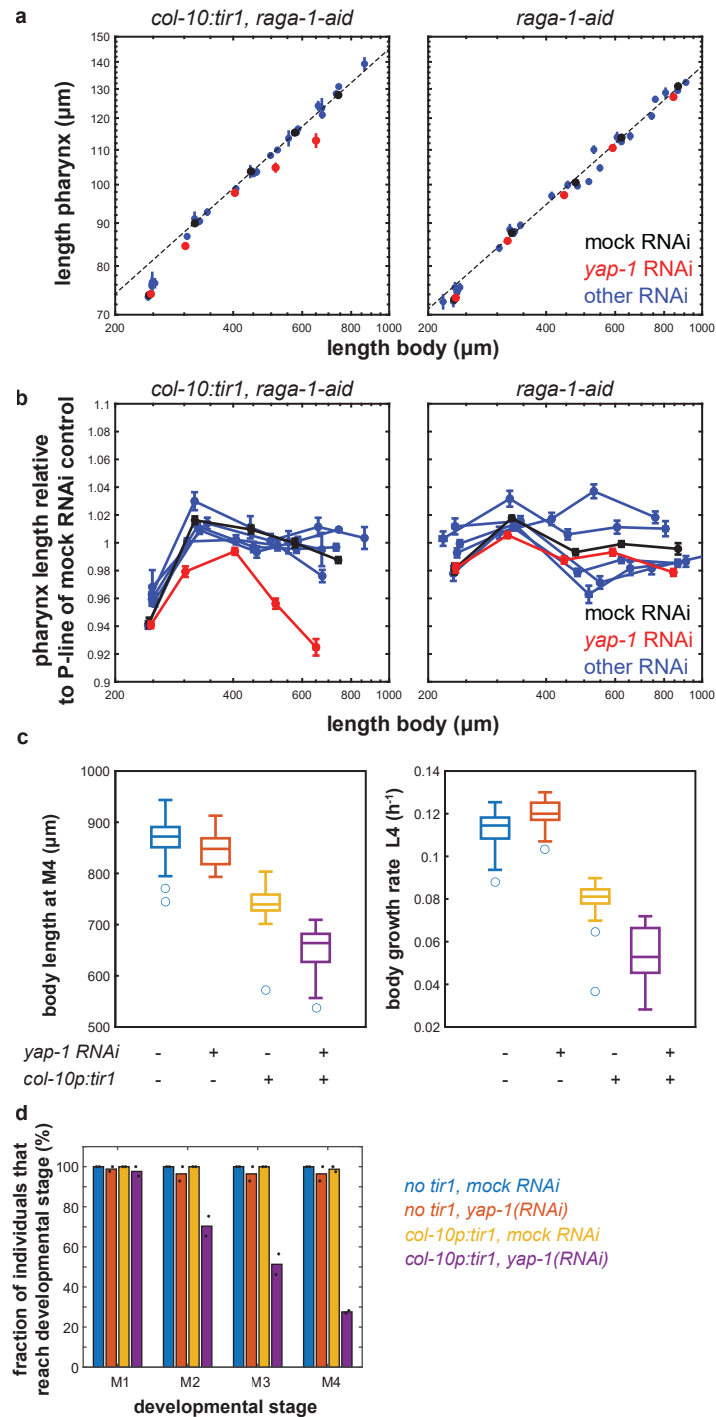

Figure 5

609 **Figure 5. *yap-1* is required for robustness of pharynx-to-body length proportions towards epidermal**  
610 **growth inhibition**

- 611 a. Pharynx vs. body length at 30% of L1 stage and at moults M1 to M4 under RAGA-1 AID in the  
612 epidermis (left) and without Tir1 expression (right) in combination with the indicated RNAi.  
613 Black: mock control, red: *yap-1*, blue: *dbl-1*, *lon-1*, *wts-1*, *ftt-2*. Black line: linear regression to  
614 M1 to M4 of mock RNAi. Error bars indicate standard error of the mean among individuals in  
615 x and y direction. If no error bars are visible, they are smaller than the marker size. See  
616 Supplemental Table 2 for details on number of individuals.
- 617 b. as a., but for deviation of pharynx length from unperturbed conditions (deviation from P-line  
618 fitted to the respective mock RNAi control).  $p < 10^{-10}$  (ranksum test) for all moults for  
619 comparison *yap-1(RNAi)* vs. mock RNAi for *col-10p:tir1* strain at M1 to M4.
- 620 c. Box plot of growth rate and length at the 4th larval stage at indicated conditions measured in  
621 micro chambers. Scatter indicates individual animals. central line: median, box: interquartile  
622 ranges (IQR), whisker: ranges except extreme outliers ( $>1.5 \cdot \text{IQR}$ ), circles: extreme outliers.  
623  $p < 10^{-9}$  (two-sided ttest) for all comparisons except unperturbed vs. *yap-1(RNAi)*.
- 624 d. Fraction of individuals reaching the indicated developmental stage within the duration of the  
625 experiment. Black circles indicate values from 2 independent day-to-day repeats.  
626  
627
